# Supplementary material
Source: PubMed Central journal article supplement (PMC6677562)
Supplement: NIHMS1036851-supplement-Fig1_5.pdf [file NIHMS1036851-supplement-Fig1_5.pdf]

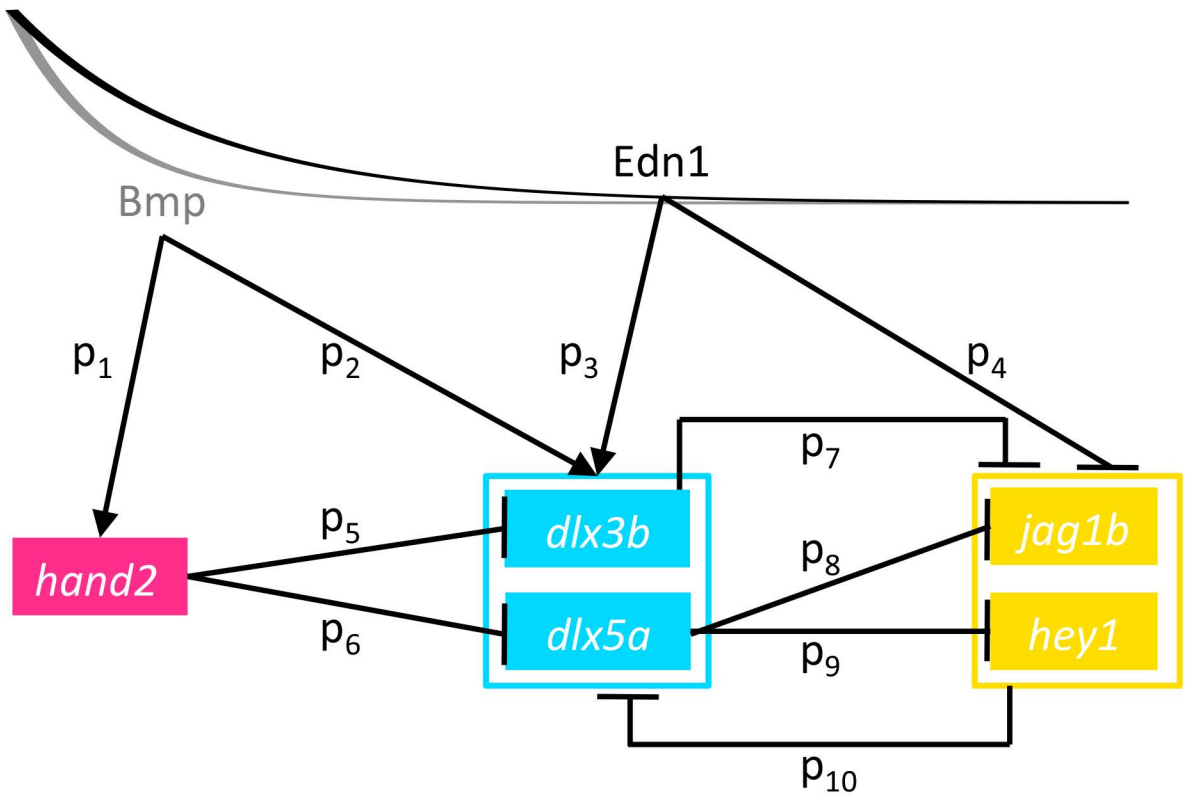

Ventral

Intermediate

Dorsal

13 hpf

DAPI

*dlx2a*

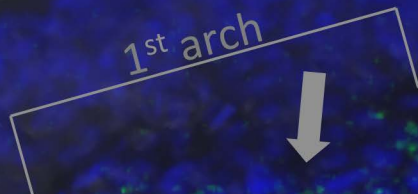

eye

yolk

# Whole arch

# Dorsal

# Other

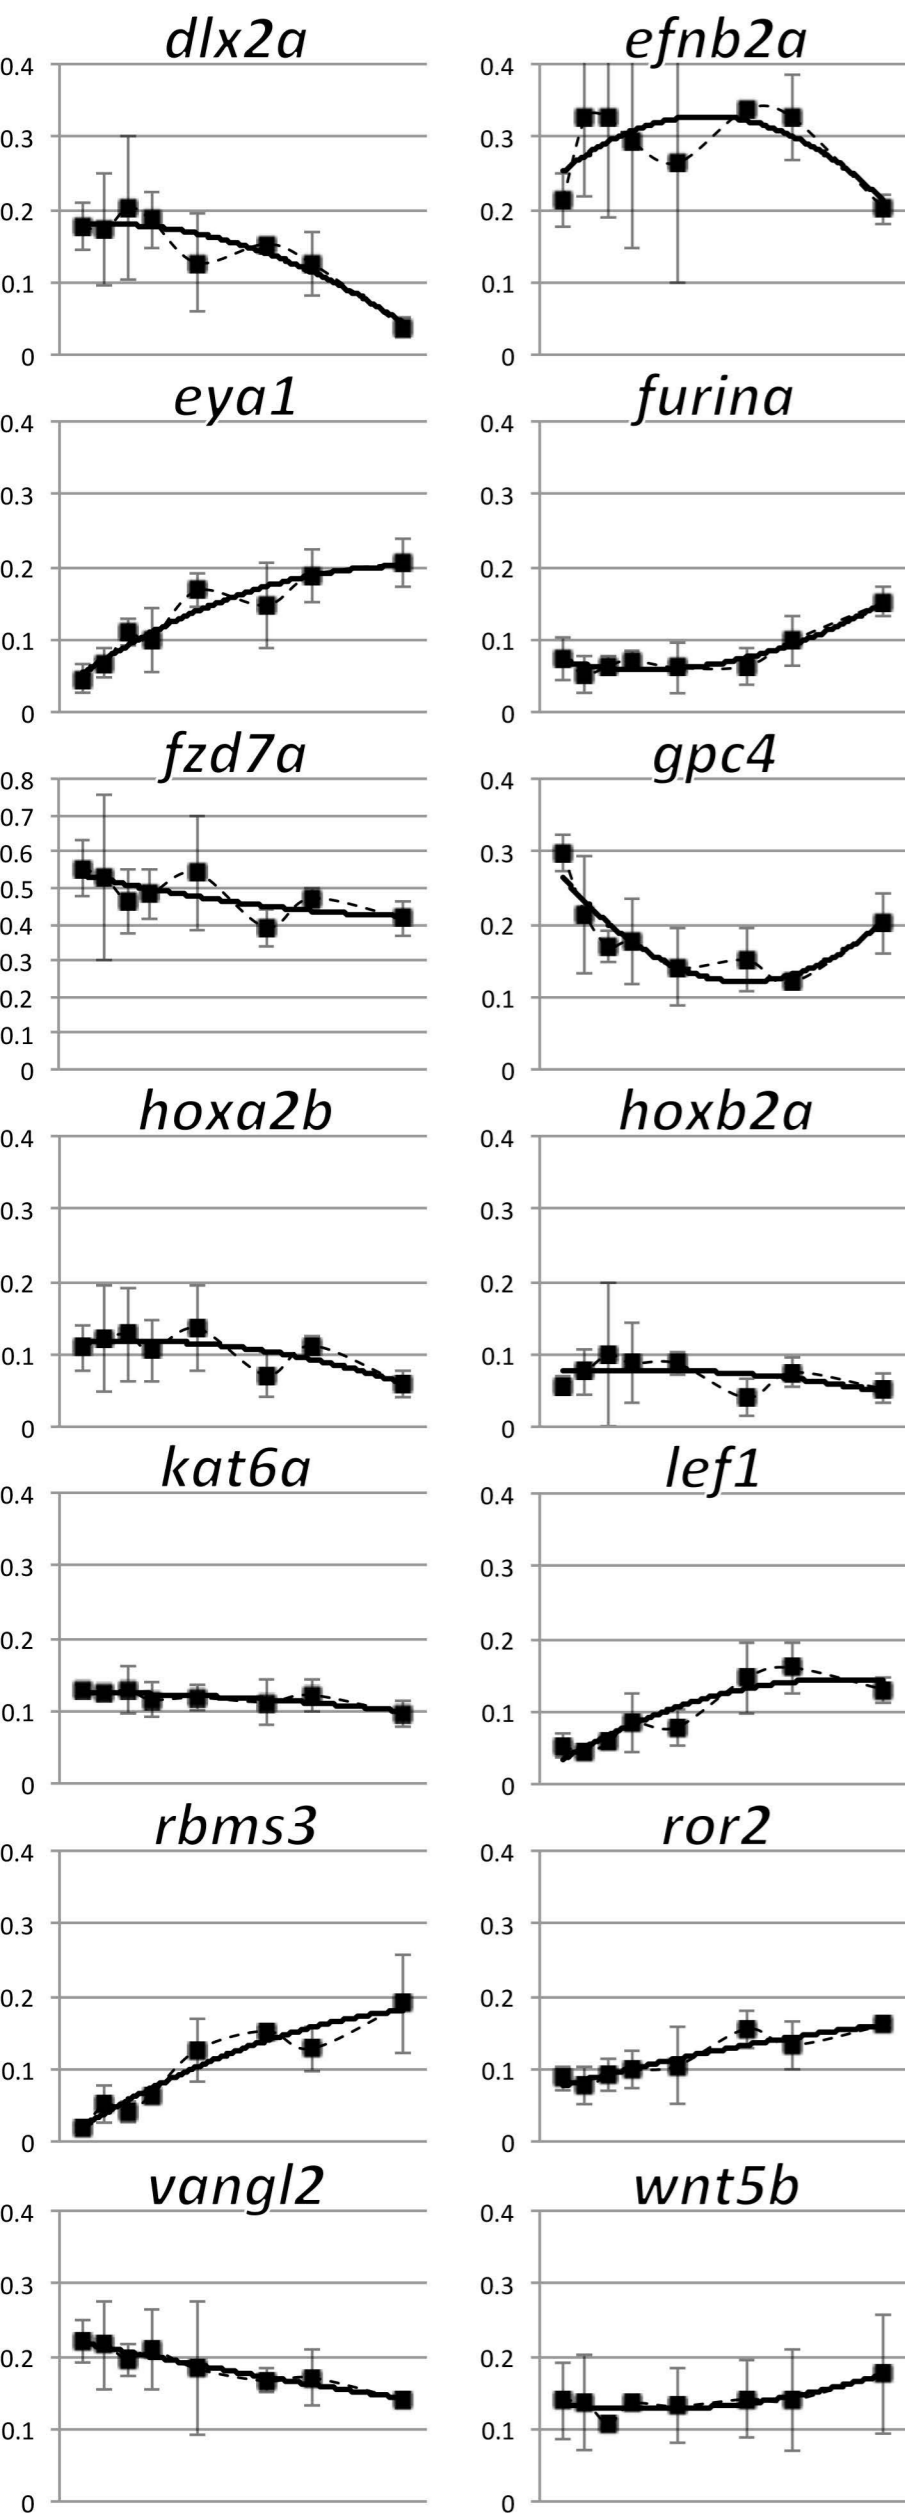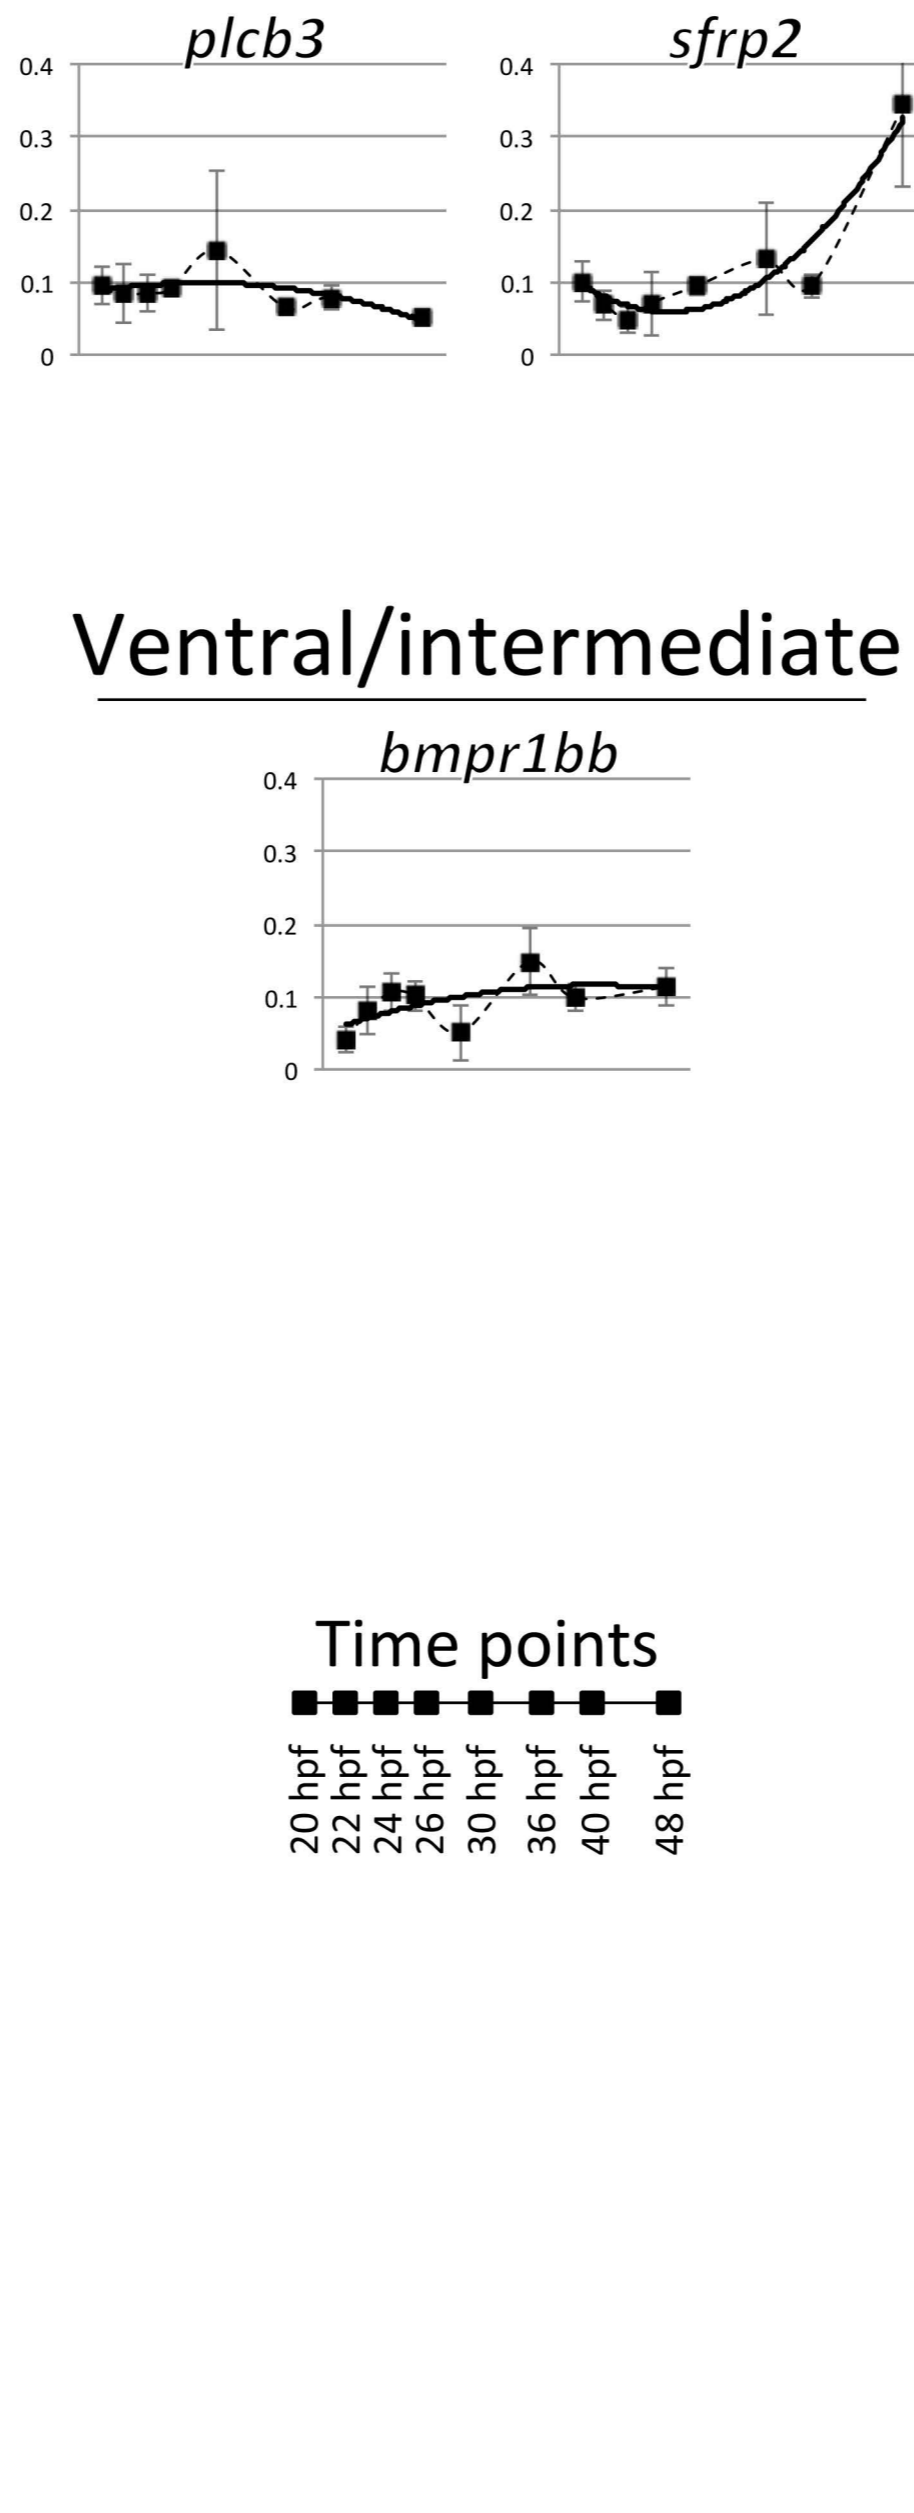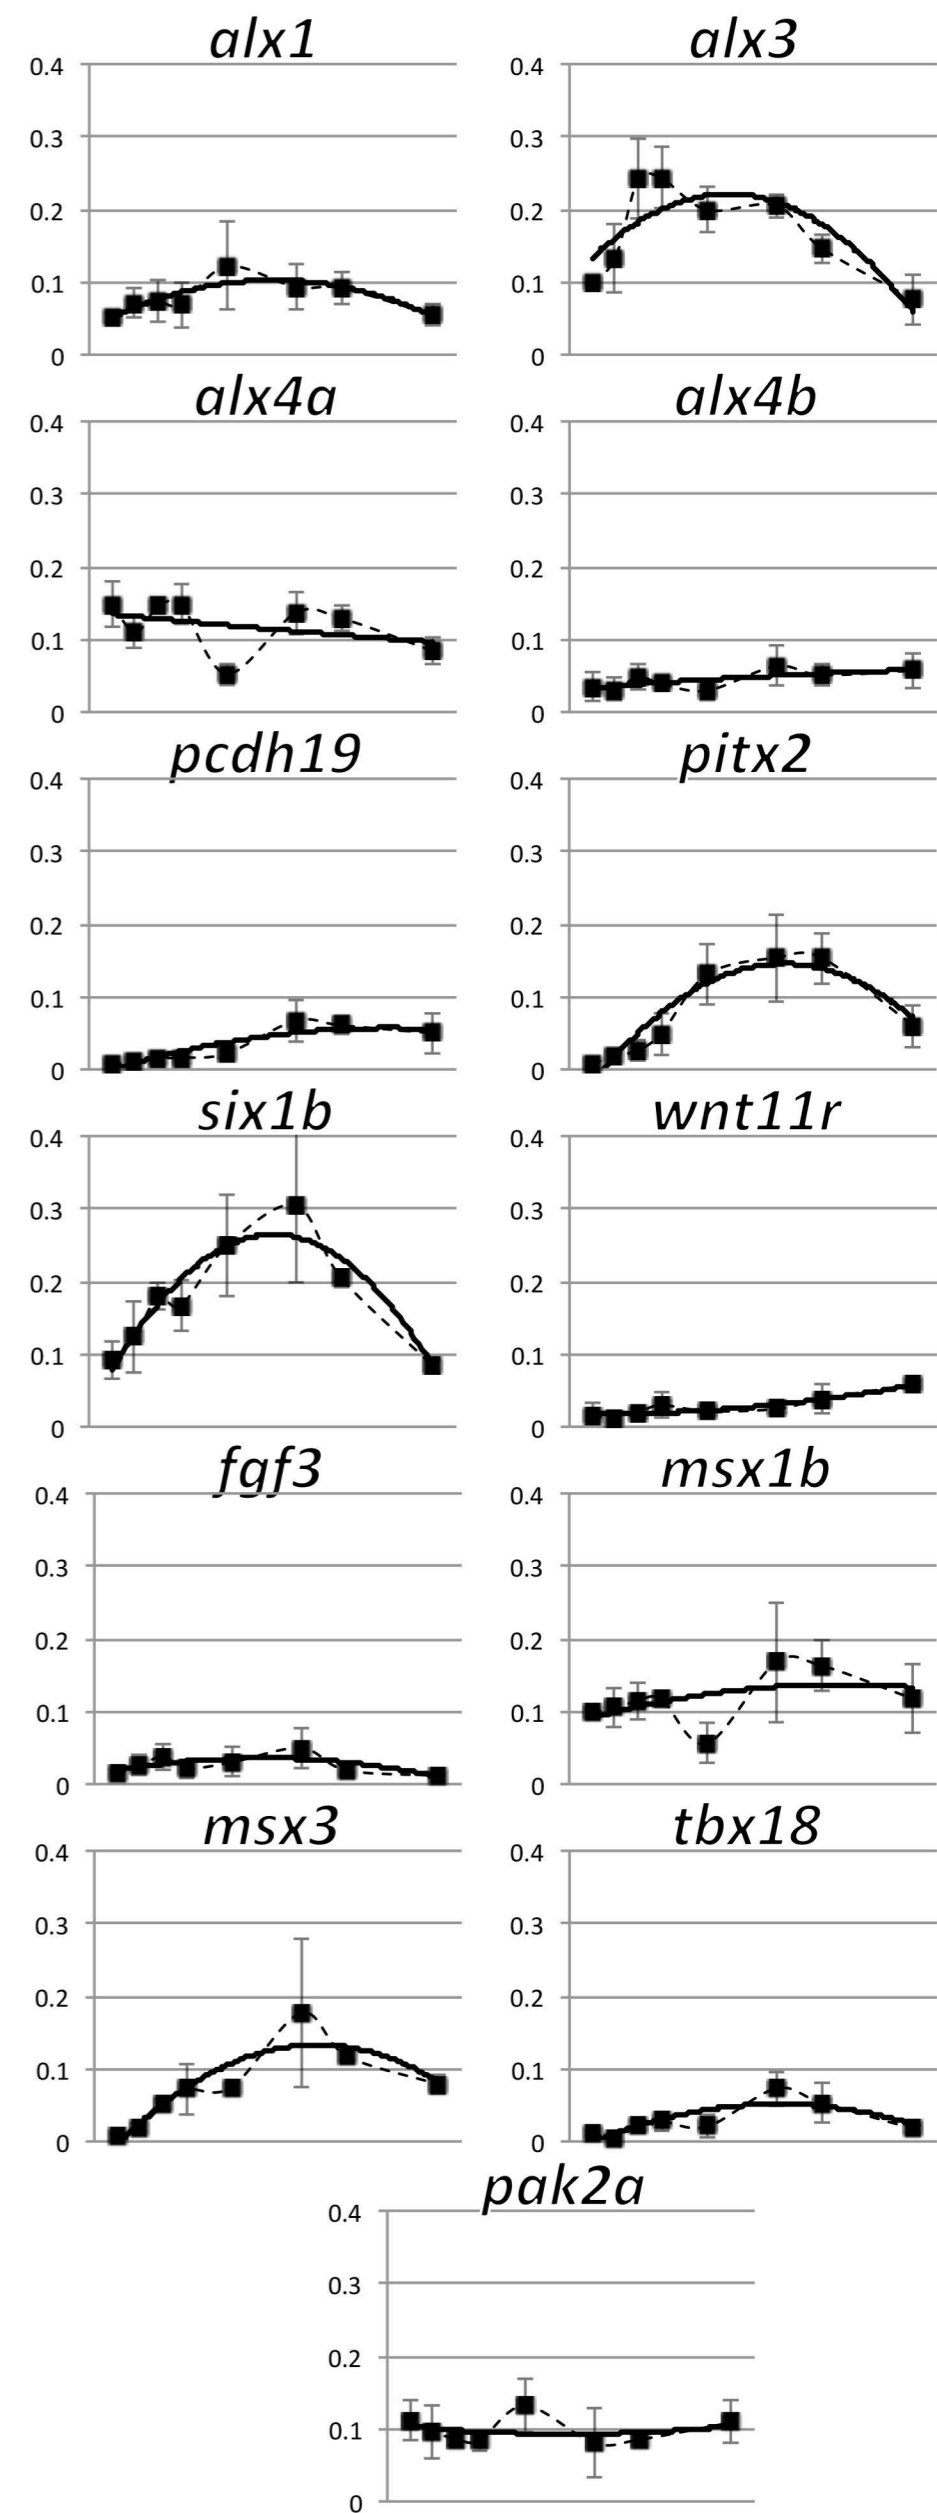

# Whole arch

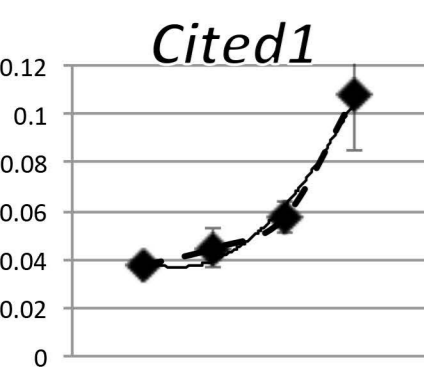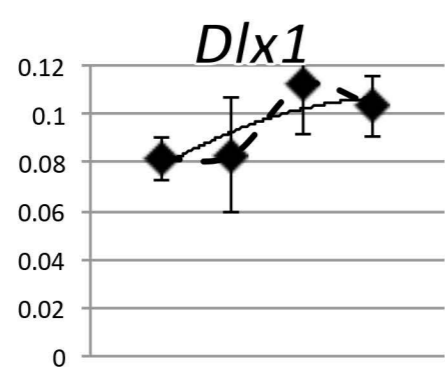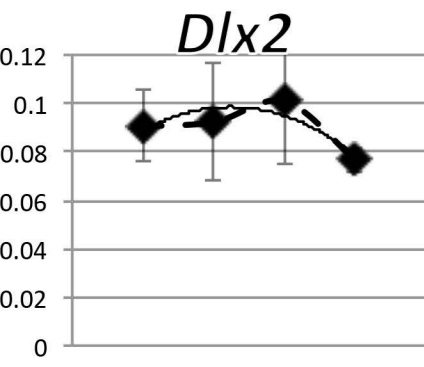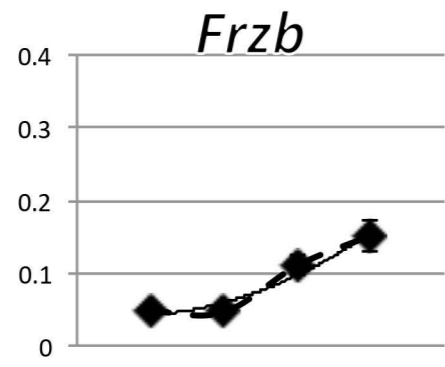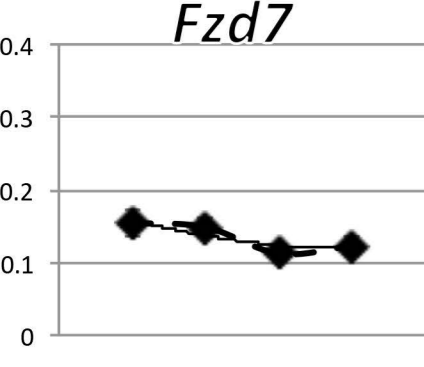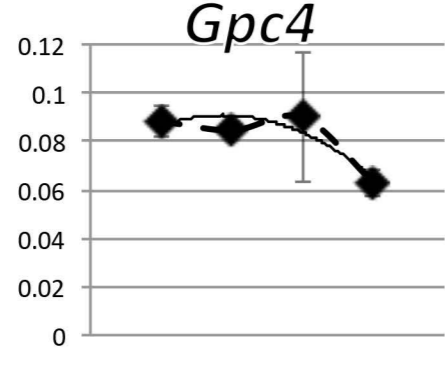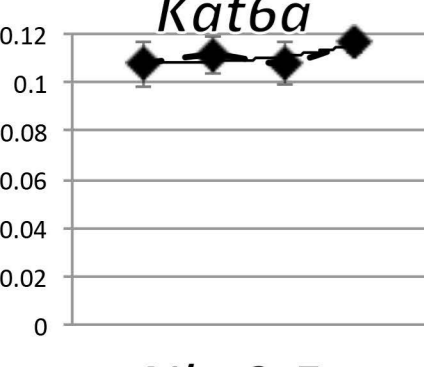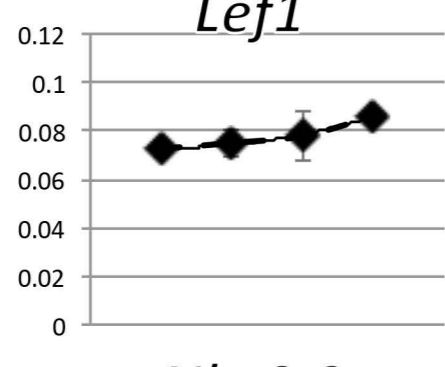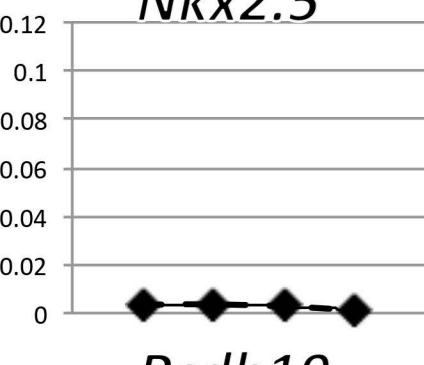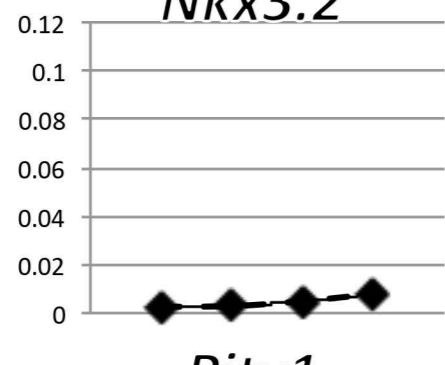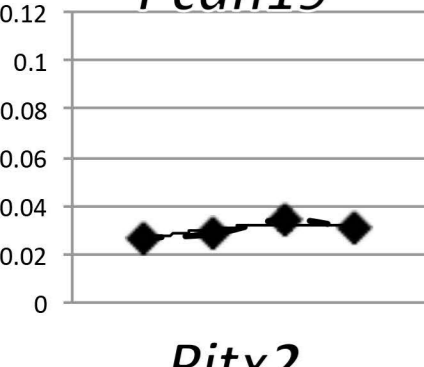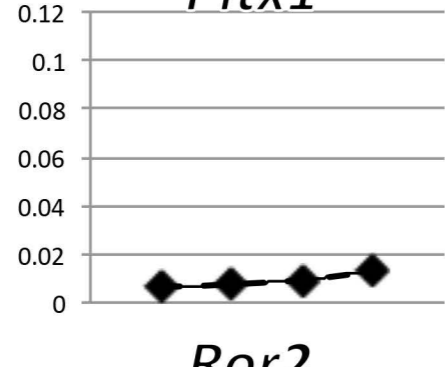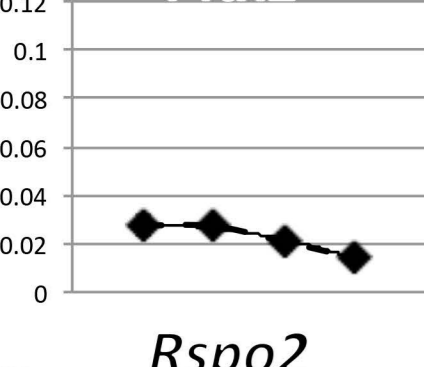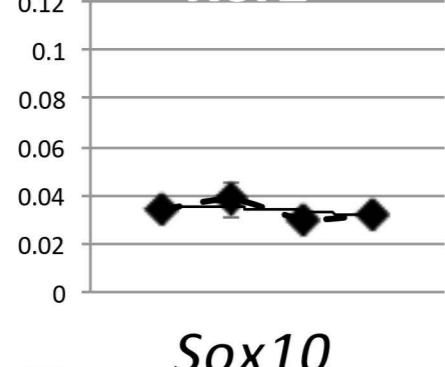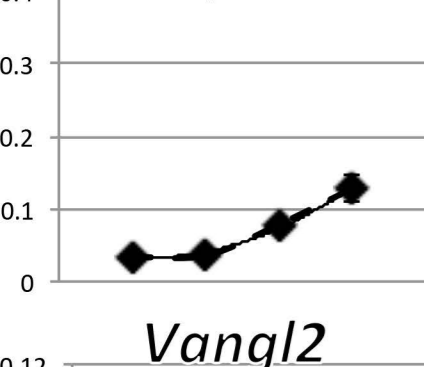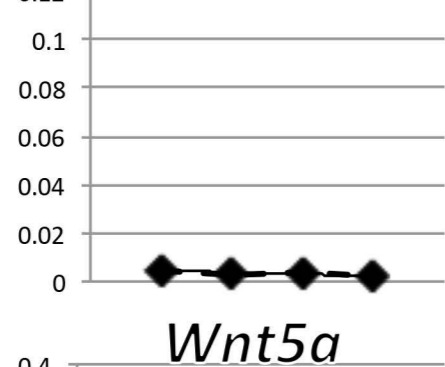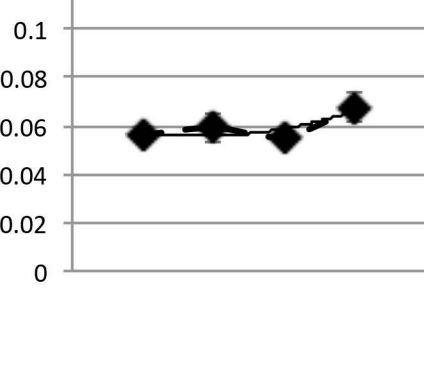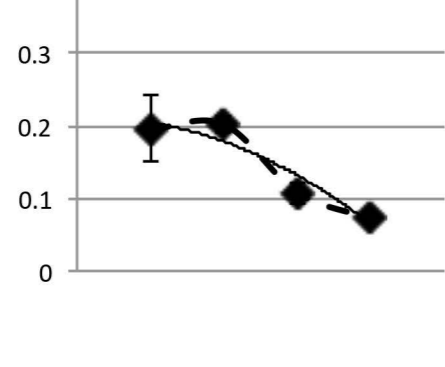

# Ventral

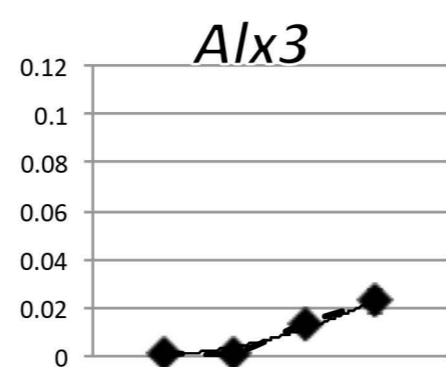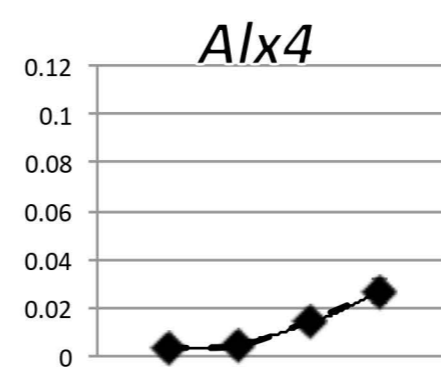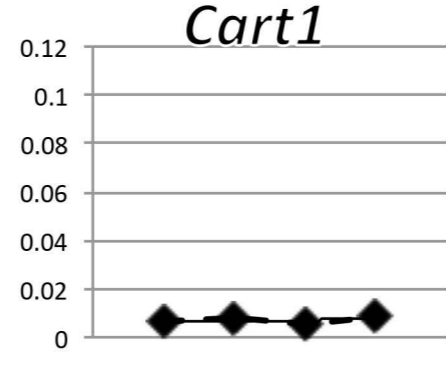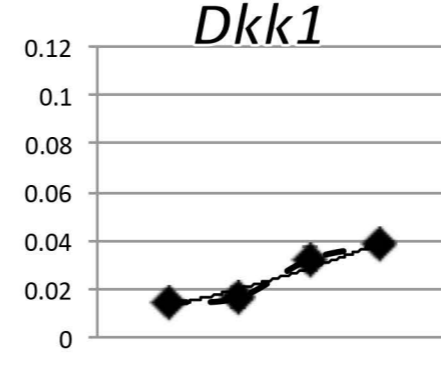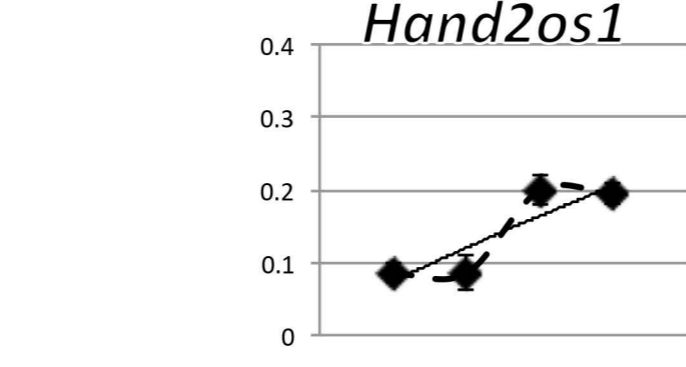

# Ventral/intermediate

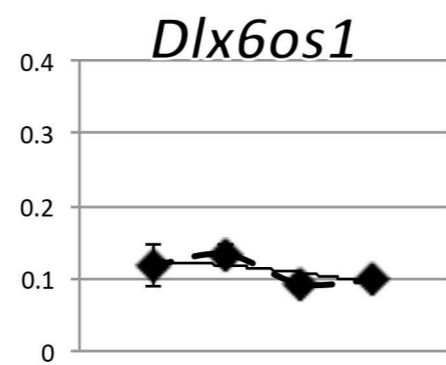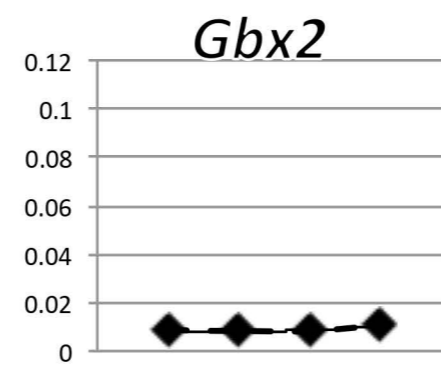

Time points:  
E9.25 E9.5 E9.75 E10.0

# Dorsal

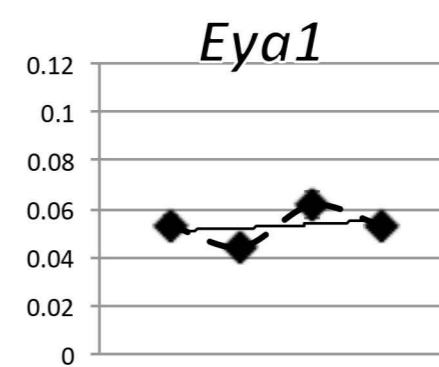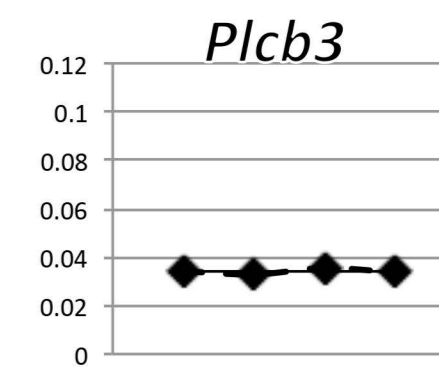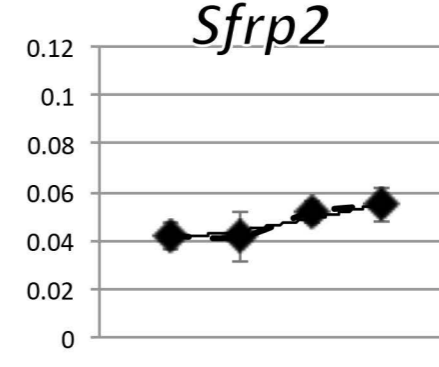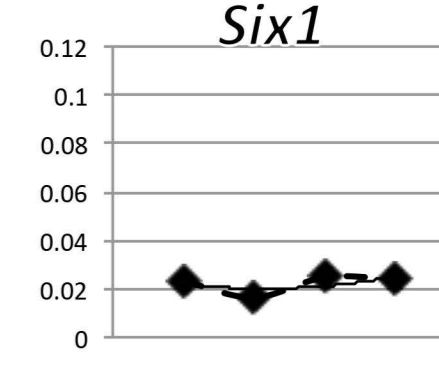

# Other

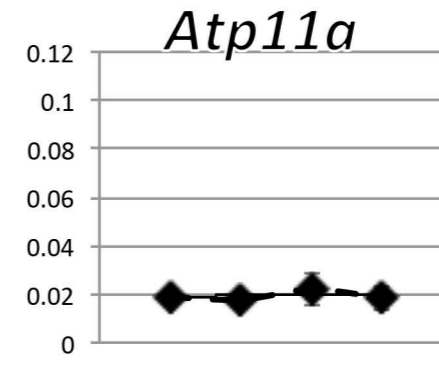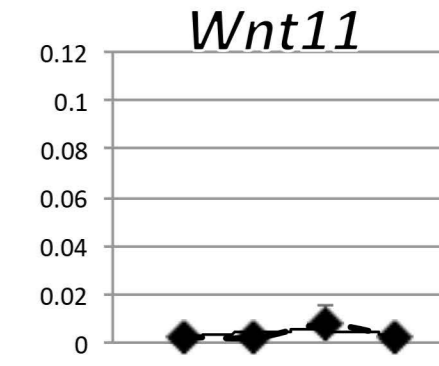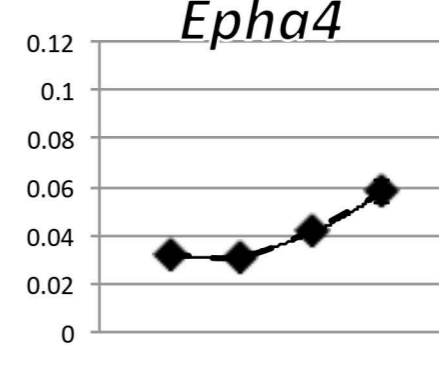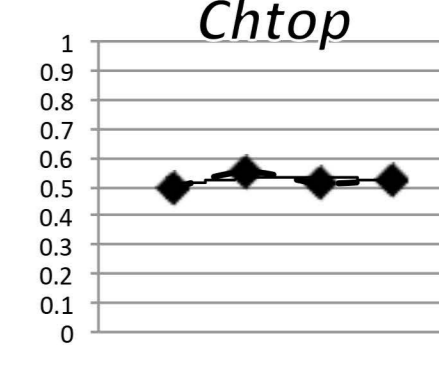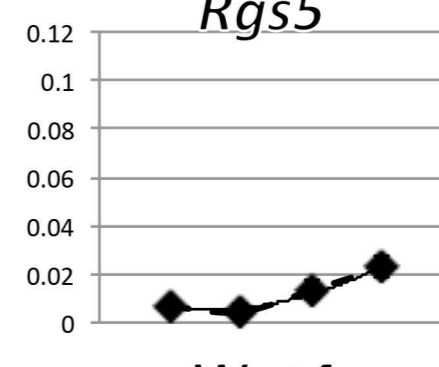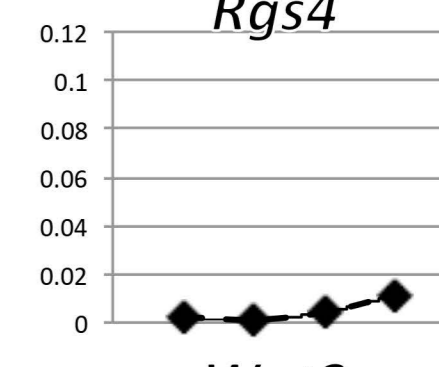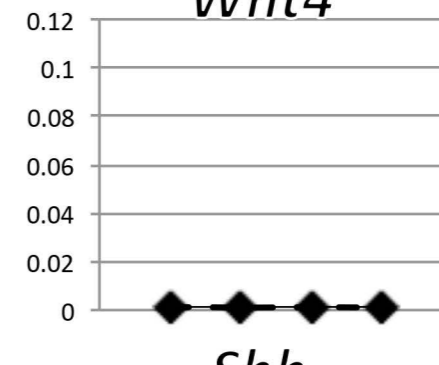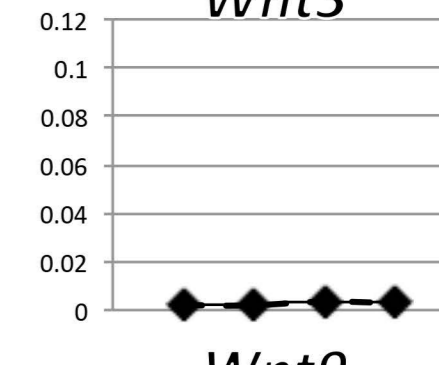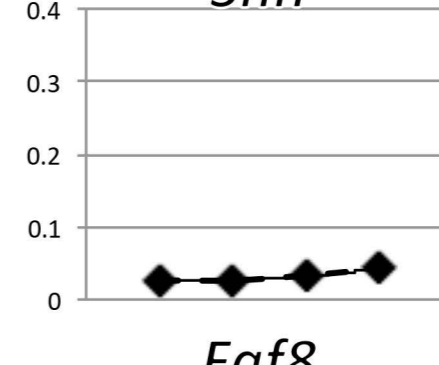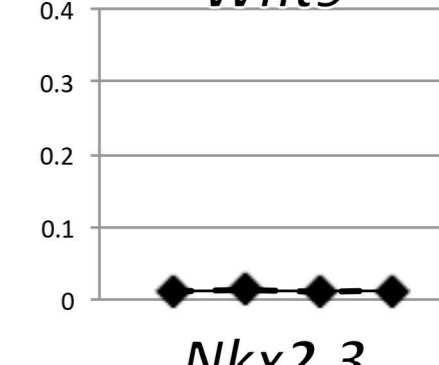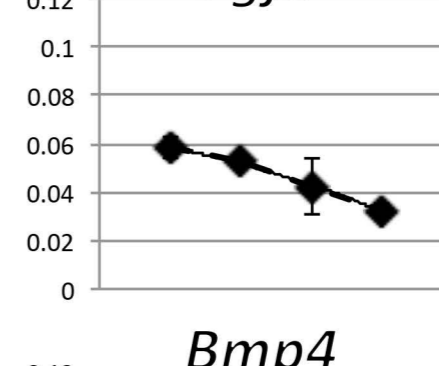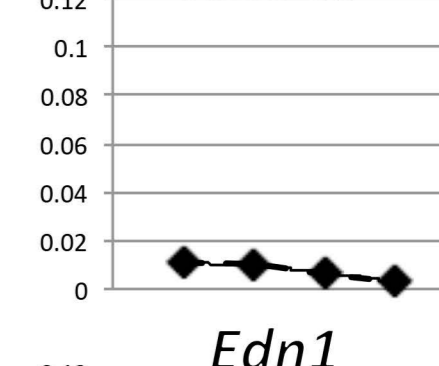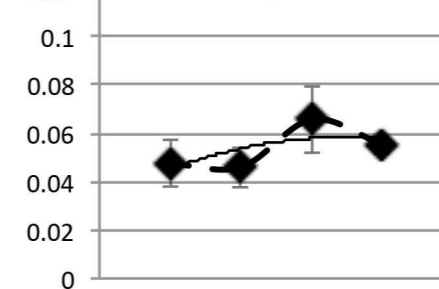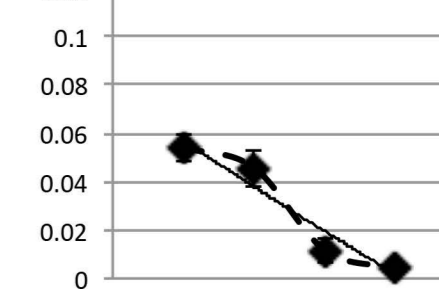

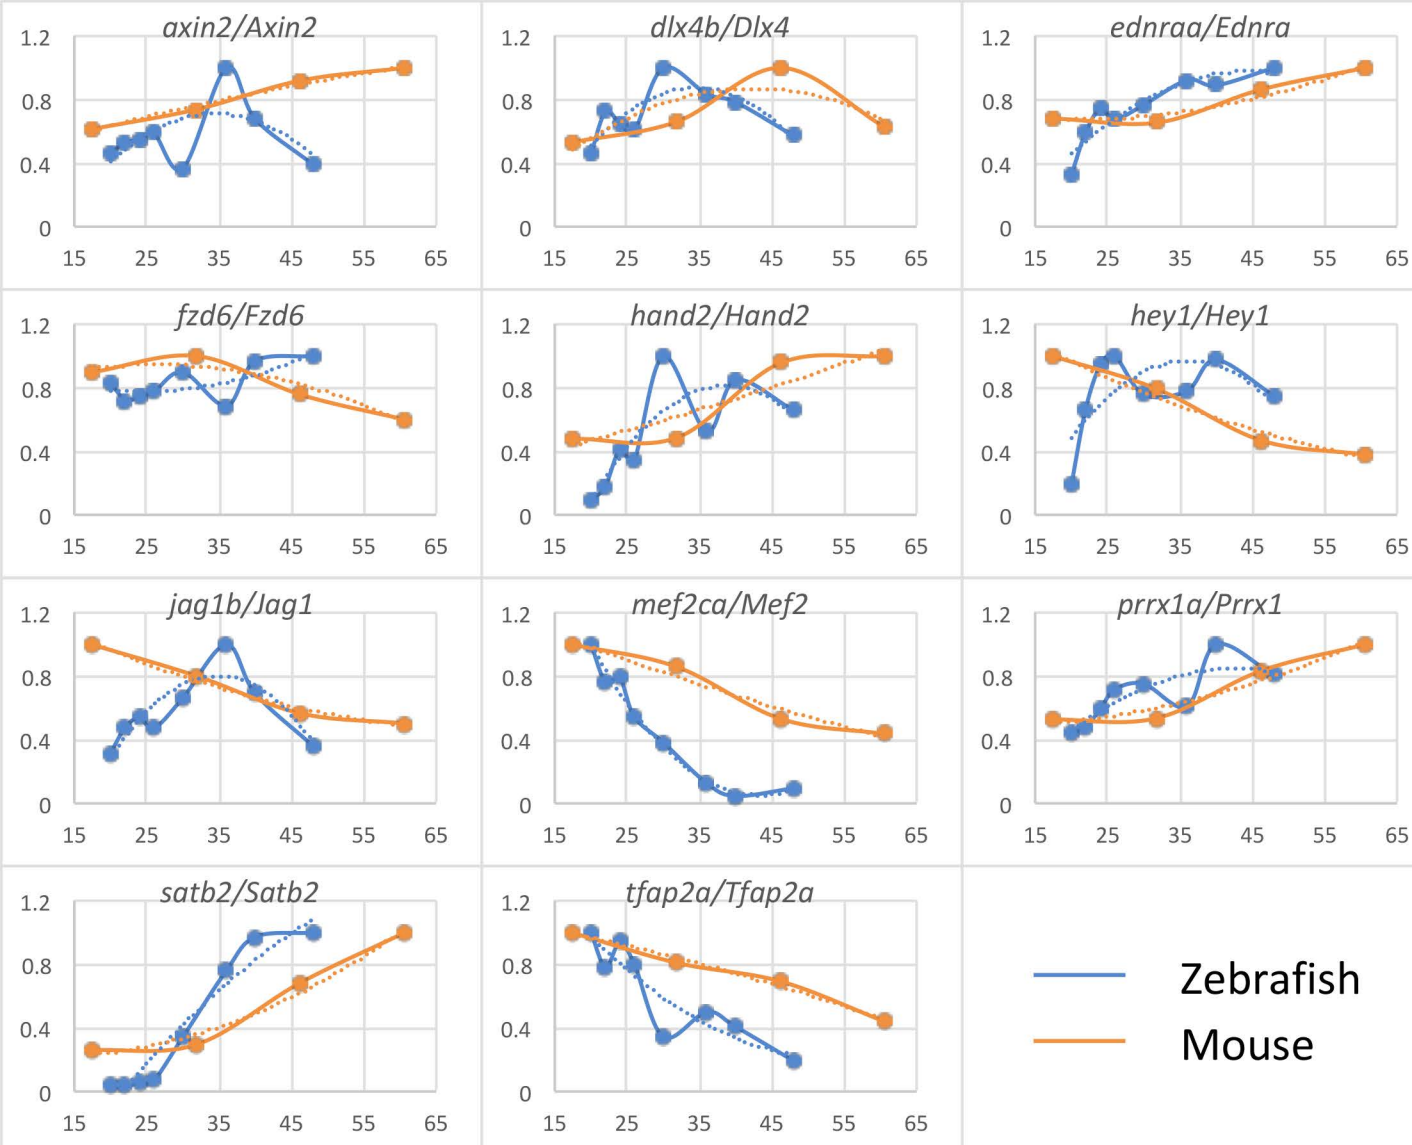

Zebrafish developmental time (hpf)

E9.25 = 17.5 hpf    E10.0 = 60.7 hpf
