# Supplementary material
Source: PubMed Central journal article supplement (PMC6677562)
Supplement: NIHMS1036851-supplement-Sup01_04.pdf [file NIHMS1036851-supplement-Sup01_04.pdf]

| <b>fish_gene_name</b> | <b>fish_acc_num</b> | <b>mouse_gene_name</b> | <b>mouse_acc_num</b> |
|-----------------------|---------------------|------------------------|----------------------|
| <i>actb2</i>          | NM_181601.3         | <i>Actb2</i>           | NM_007393.5          |
| <i>alx1</i>           | NM_001045074.1      | <i>Alx3</i>            | NM_007441.3          |
| <i>alx3</i>           | XM_690238.3         | <i>Alx4</i>            | NM_007442.3          |
| <i>alx4a</i>          | XM_001340930.4      | <i>Atp11a</i>          | NM_001293667.1       |
| <i>alx4b</i>          | NM_001089357.1      | <i>Axin2</i>           | NM_015732.4          |
| <i>axin2</i>          | NM_131561.1         | <i>Barx1</i>           | NM_007526.4          |
| <i>barx1</i>          | NM_001024949.1      | <i>Bmp4</i>            | NM_007554.3          |
| <i>bmp4</i>           | NM_131342.2         | <i>Bmpr1a</i>          | NM_009758.4          |
| <i>bmpr1ab</i>        | NM_001004585.1      | <i>Cart1</i>           | X92346.1             |
| <i>bmpr1ba</i>        | NM_131457.2         | <i>Cdc42</i>           | NM_009861.3          |
| <i>bmpr1bb</i>        | NM_001145996.1      | <i>Chtop</i>           | NM_023215.6          |
| <i>brf1a</i>          | NM_199898.1         | <i>Cited1</i>          | NM_007709.4          |
| <i>cdc42</i>          | NM_200632.2         | <i>Dkk1</i>            | NM_010051.3          |
| <i>cited1</i>         | NM_001114891.1      | <i>Dlx1</i>            | NM_010057.2          |
| <i>dkk1b</i>          | NM_131003.1         | <i>Dlx2</i>            | NM_010054.2          |
| <i>dlx2a</i>          | NM_131311.2         | <i>Dlx3</i>            | NM_010055.3          |
| <i>dlx3b</i>          | NM_131322.2         | <i>Dlx4</i>            | NM_007867.4          |
| <i>dlx4a</i>          | NM_131300.2         | <i>Dlx5</i>            | NM_010056.3          |
| <i>dlx4b</i>          | NM_131318.1         | <i>Dlx6</i>            | NM_010057.2          |
| <i>dlx5a</i>          | NM_131306.2         | <i>Dlx6os1</i>         | NR_015388.1          |
| <i>dlx6a</i>          | NM_131323.1         | <i>Edn1</i>            | NM_010104.4          |
| <i>edn1</i>           | NM_131519.1         | <i>Ednra</i>           | NM_010332.2          |
| <i>ednraa</i>         | NM_001099445.1      | <i>Epha4</i>           | NM_007936.3          |
| <i>ednrab</i>         | NM_212930.1         | <i>Eya1</i>            | NM_010164.2          |
| <i>efnb2a</i>         | NM_131023.1         | <i>Fgf3</i>            | NM_008007.2          |
| <i>epha4b</i>         | NM_153658.1         | <i>Fgf8</i>            | NM_010205.2          |
| <i>eya1</i>           | NM_131193.1         | <i>Foxd3</i>           | NM_010425.3          |
| <i>fgf3</i>           | NM_131291.1         | <i>Frzb</i>            | NM_011356.4          |
| <i>fgf8a</i>          | NM_131281.2         | <i>Fzd6</i>            | NM_008056.3          |
| <i>foxd3</i>          | NM_131290.1         | <i>Fzd7</i>            | NM_008057.3          |
| <i>frzb</i>           | NM_130943.2         | <i>Gbx2</i>            | NM_010262.3          |
| <i>furina</i>         | NM_001045106.2      | <i>Gdf5</i>            | NM_008109.2          |
| <i>fzd6</i>           | NM_200561.2         | <i>Gpc4</i>            | NM_008150.2          |
| <i>fzd7a</i>          | NM_131139.1         | <i>Grem2</i>           | NM_011825.1          |
| <i>gbx2</i>           | NM_152964.1         | <i>Gsc</i>             | NM_010351.1          |
| <i>gdf5</i>           | XM_002662541.3      | <i>Hand1</i>           | NM_008213.2          |
| <i>gpc4</i>           | NM_131860.2         | <i>Hand2</i>           | NM_010402.4          |
| <i>grem2b</i>         | NM_001017704.1      | <i>Hey1</i>            | NM_010423.2          |
| <i>gsc</i>            | NM_131017.1         | <i>Irx5</i>            | NM_018826.2          |
| <i>hand2</i>          | NM_131626.3         | <i>Jag1</i>            | NM_013822.5          |
| <i>hey1</i>           | NM_212561.1         | <i>Kat6a</i>           | NM_001081149.1       |
| <i>hoxa2b</i>         | NM_131106.1         | <i>Lef1</i>            | NM_010703.4          |
| <i>hoxb2a</i>         | NM_131116.2         | <i>Mef2</i>            | NM_001170537.1       |
| <i>irx7</i>           | NM_131881.1         | <i>Msx1</i>            | NM_010835.2          |
| <i>jag1b</i>          | NM_131863.1         | <i>Msx2</i>            | NM_013601.2          |

|               |                |               |                |
|---------------|----------------|---------------|----------------|
| <i>kat6a</i>  | NM_001123312.4 | <i>Nkx2.3</i> | NM_008699.2    |
| <i>lef1</i>   | NM_131426.1    | <i>Nkx2.5</i> | NM_008700.2    |
| <i>mef2ca</i> | NM_131312.2    | <i>Nkx3.2</i> | NM_007524.3    |
| <i>msx1a</i>  | NM_131273.1    | <i>Notch2</i> | NM_010928.2    |
| <i>msx1b</i>  | NM_131260.1    | <i>Pcdh19</i> | NM_001105245.1 |
| <i>msx3</i>   | NM_131272.2    | <i>Pitx1</i>  | NM_011097.2    |
| <i>mycn</i>   | NM_212614.2    | <i>Pitx2</i>  | NM_001042504.2 |
| <i>nkx2.3</i> | NM_131423.1    | <i>Plcb3</i>  | NM_001290349.1 |
| <i>nkx2.5</i> | NM_131421.1    | <i>Prxx1</i>  | NM_175686.3    |
| <i>nkx2.7</i> | NM_131419.1    | <i>Rgs4</i>   | NM_009062.3    |
| <i>nkx3.2</i> | NM_178132.2    | <i>Rgs5</i>   | NM_009063.4    |
| <i>notch2</i> | NM_001115094.1 | <i>Ror2</i>   | NM_013846.3    |
| <i>pak2a</i>  | NM_001002717.1 | <i>Rpl37</i>  | NM_026069.3    |
| <i>pcdh19</i> | NM_001127519.2 | <i>Rspo2</i>  | NM_172815.3    |
| <i>pitx1</i>  | NM_001040346.2 | <i>Runx2</i>  | NM_001146038.2 |
| <i>pitx2</i>  | NM_130975.2    | <i>Satb2</i>  | NM_139146.2    |
| <i>plcb3</i>  | NM_001122773.1 | <i>Sfrp2</i>  | NM_009144.2    |
| <i>prrx1a</i> | NM_214734.1    | <i>Shh</i>    | NM_009170.3    |
| <i>rbms3</i>  | NM_001076716.1 | <i>Six1</i>   | NM_009189.3    |
| <i>rgs4</i>   | NM_199274.1    | <i>Sox10</i>  | NM_011437.1    |
| <i>rgs5a</i>  | NM_199962.1    | <i>Sox9</i>   | NM_011448.4    |
| <i>ror2</i>   | XM_684589.7    | <i>Stau2</i>  | NM_001111272.1 |
| <i>rpl37</i>  | NM_001002069.2 | <i>Tbx18</i>  | NM_023814.4    |
| <i>rspo2</i>  | NM_001281990.1 | <i>Tfap2a</i> | NM_011547.4    |
| <i>runx2b</i> | NM_212862.2    | <i>Ubb</i>    | NM_011664.4    |
| <i>satb2</i>  | NM_001128532.1 | <i>Vangl2</i> | NM_033509.4    |
| <i>sfrp2</i>  | NM_001077384.2 | <i>Wnt11</i>  | NM_001285792.1 |
| <i>shha</i>   | NM_131063.1    | <i>Wnt3</i>   | NM_009521.2    |
| <i>six1b</i>  | NM_207095.1    | <i>Wnt4</i>   | NM_009523.2    |
| <i>sox10</i>  | NM_131875.1    | <i>Wnt5a</i>  | NM_009524.3    |
| <i>sox9a</i>  | NM_131643.1    | <i>Wnt9</i>   | NM_011719.4    |
| <i>sox9b</i>  | NM_131644.1    |               |                |
| <i>stau2</i>  | NM_200925.1    |               |                |
| <i>tbx18</i>  | NM_153665.1    |               |                |
| <i>tfap2a</i> | NM_176859.2    |               |                |
| <i>ubb</i>    | NM_001013272.2 |               |                |
| <i>vangl2</i> | NM_153674.1    |               |                |
| <i>wnt11</i>  | NM_001144804.1 |               |                |
| <i>wnt11r</i> | NM_131076.2    |               |                |
| <i>wnt4a</i>  | NM_001040387.1 |               |                |
| <i>wnt5b</i>  | NM_130937.1    |               |                |
| <i>wnt9a</i>  | NM_001045363.1 |               |                |
| <i>wnt9b</i>  | NM_001137660.2 |               |                |

| Reaction rates |          | GRN parameters |        |
|----------------|----------|----------------|--------|
| $d_{hand2}$    | 1        | $p_1$          | 0.0044 |
| $d_{dlx3b}$    | 4        | $p_2$          | 0.003  |
| $d_{dlx5a}$    | 4        | $p_3$          | 0.0005 |
| $d_{jag1b}$    | 0.25     | $p_4$          | 0.007  |
| $d_{hey1}$     | 12.5     | $p_5$          | 0.5    |
| $vM_{hand2}$   | 1        | $p_6$          | 0.25   |
| $vM_{dlx3b}$   | 4        | $p_7$          | 0.17   |
| $vM_{dlx5a}$   | 4        | $p_8$          | 0.17   |
| $vM_{jag1b}$   | 0.25     | $p_9$          | 0.85   |
| $vM_{hey1}$    | 12.5     | $p_{10}$       | 0.007  |
| $vB$           | 0.000001 |                |        |

| <b>Zebrafish gene</b> | <b>Regulation</b>      | <b>Reference</b>                                                                      |
|-----------------------|------------------------|---------------------------------------------------------------------------------------|
| barx1                 | Up by Bmp and Edn      | Barske et al., 2016; Nichols et al., 2013                                             |
| bmpr1ab               | Up by Wnt              | Alexander et al., 2014                                                                |
| bmpr1ba               | Up by Wnt              | Alexander et al., 2014                                                                |
| dlx3b                 | Up by Bmp and Edn      | Alexander et al., 2011; Zuniga et al., 2010; Zuniga et al., 2011                      |
| dlx4a                 | Up by Bmp and Edn      | Alexander et al., 2011; Zuniga et al., 2010; Zuniga et al., 2011                      |
| dlx4b                 | Up by Bmp and Edn      | Alexander et al., 2011; Zuniga et al., 2010; Zuniga et al., 2011                      |
| dlx5a                 | Up by Bmp and Edn      | Alexander et al., 2011; Zuniga et al., 2010; Zuniga et al., 2011                      |
| dlx6a                 | Up by Bmp and Edn      | Alexander et al., 2011; Zuniga et al., 2010; Zuniga et al., 2011                      |
| ednraa                | Up by Edn              | Nair et al., 2007                                                                     |
| ednrab                | Up by Edn              | Nair et al., 2007                                                                     |
| epha4b                | Up by Bmp and Edn      | Zuniga et al., 2010; Zuniga et al., 2011                                              |
| grem2b                | Up by Jag/Notch        | Zuniga et al., 2011                                                                   |
| hand2                 | Up by Bmp and Edn      | Alexander et al., 2011; Miller et al., 2003; Zuniga et al., 2010; Zuniga et al., 2011 |
| hey1                  | Up by Jag/Notch        | Zuniga et al., 2010                                                                   |
| jag1b                 | Up by Jag/Notch        | Zuniga et al., 2010                                                                   |
| msx1                  | Up by Bmp and Edn      | Alexander et al., 2011; Miller et al., 2003; Zuniga et al., 2010; Zuniga et al., 2011 |
| mycn                  | Up by Wnt              | Alexander et al., 2014                                                                |
| notch2                | Up by Edn              | Zuniga et al., 2010                                                                   |
| prrx1a                | Up by Bmp, down by Edn | Barske et al., 2016                                                                   |
| satb2                 | Up by Bmp              | Sheehan-Rooney et al., 2013                                                           |
| sox9a                 | Up by Edn              | Barske et al., 2016                                                                   |
|                       |                        |                                                                                       |
| <b>Mouse gene</b>     | <b>Regulation</b>      |                                                                                       |
| Dlx3                  | Up by Edn              | Clouthier et al., 2000; Tavares et al., 2012                                          |
| Dlx5                  | Up by Bmp              | Charité et al., 2001; Merlo et al., 2002; Panganiban and                              |

|       |                   |                                                                                       |
|-------|-------------------|---------------------------------------------------------------------------------------|
|       | and Edn           | Rubenstein, 2002; Ruest et al., 2004; Tavares et al., 2012; Vincentz et al., 2016     |
| Dlx6  | Up by Bmp and Edn | Ruest et al., 2004; Tavares et al., 2012; Vincentz et al., 2016                       |
| Gsc   | Up by Edn         | Clouthier et al., 1998                                                                |
| Hand1 | Up by Bmp and Edn | Charité et al., 2001; Clouthier et al., 2000; Liu et al., 2004; Vincentz et al., 2016 |
| Hand2 | Up by Bmp and Edn | Charité et al., 2001; Clouthier et al., 2000; Liu et al., 2004                        |
| Hey1  | Up by Jag/Notch   | Tavares et al., 2017                                                                  |
| Jag1  | Up by Jag/Notch   | Tavares et al., 2017                                                                  |
| Msx1  | Up by Bmp         | Liu et al., 2005                                                                      |
| Msx2  | Up by Bmp         | Liu et al., 2005                                                                      |
| Satb2 | Up by Bmp         | Bonilla-Claudio et al., 2012                                                          |

- Alexander, C., Zuniga, E., Blitz, I. L., Wada, N., Pabic, P. L., Javidan, Y., Zhang, T., Cho, K. W., Crump, J. G. and Schilling, T. F. (2011). Combinatorial roles for BMPs and Endothelin 1 in patterning the dorsal-ventral axis of the craniofacial skeleton. *Development* 138, 5135–5146.
- Alexander, C., Piloto, S., Le Pabic, P. and Schilling, T. F. (2014). Wnt Signaling Interacts with Bmp and Edn1 to Regulate Dorsal-Ventral Patterning and Growth of the Craniofacial Skeleton. *PLoS Genet* 10, e1004479.
- Barske, L., Askary, A., Zuniga, E., Balczerski, B., Bump, P., Nichols, J. T. and Crump, J. G. (2016). Competition between Jagged-Notch and Endothelin1 Signaling Selectively Restricts Cartilage Formation in the Zebrafish Upper Face. *PLoS Genet* 12, e1005967.
- Bonilla-Claudio, M., Wang, J., Bai, Y., Klysik, E., Selever, J. and Martin, J. F. (2012). Bmp signaling regulates a dose-dependent transcriptional program to control facial skeletal development. *Development* 139, 709–719.
- Charité, J., McFadden, D. G., Merlo, G., Levi, G., Clouthier, D. E., Yanagisawa, M., Richardson, J. A. and Olson, E. N. (2001). Role of Dlx6 in regulation of an endothelin-1-dependent, dHAND branchial arch enhancer. *Genes Dev.* 15, 3039–3049.
- Clouthier, D. E., Hosoda, K., Richardson, J. A., Williams, S. C., Yanagisawa, H., Kuwaki, T., Kumada, M., Hammer, R. E. and Yanagisawa, M. (1998). Cranial and cardiac neural crest defects in endothelin-A receptor-deficient mice. *Development* 125, 813–824.
- Clouthier, D. E., Williams, S. C., Yanagisawa, H., Wieduwilt, M., Richardson, J. A. and Yanagisawa, M. (2000). Signaling Pathways Crucial for Craniofacial Development Revealed by Endothelin-A Receptor-Deficient Mice. *Dev. Biol.* 217, 10–24.

- Liu, W., Selever, J., Wang, D., Lu, M.-F., Moses, K. A., Schwartz, R. J. and Martin, J. F. (2004). Bmp4 signaling is required for outflow-tract septation and branchial-arch artery remodeling. *Proc. Natl. Acad. Sci.* 101, 4489–4494.
- Liu, W., Selever, J., Murali, D., Sun, X., Brugger, S. M., Ma, L., Schwartz, R. J., Maxson, R., Furuta, Y. and Martin, J. F. (2005). Threshold-specific requirements for Bmp4 in mandibular development. *Dev. Biol.* 283, 282–293.
- Merlo, G. R., Paleari, L., Mantero, S., Zerega, B., Adamska, M., Rinkwitz, S., Bober, E. and Levi, G. (2002). The Dlx5 Homeobox Gene Is Essential for Vestibular Morphogenesis in the Mouse Embryo through a BMP4-Mediated Pathway. *Dev. Biol.* 248, 157–169.
- Miller, C. T., Yelon, D., Stainier, D. Y. R. and Kimmel, C. B. (2003). Two endothelin 1 effectors, hand2 and bapx1, pattern ventral pharyngeal cartilage and the jaw joint. *Development* 130, 1353–1365.
- Nair, S., Li, W., Cornell, R. and Schilling, T. F. (2007). Requirements for Endothelin type-A receptors and Endothelin-1 signaling in the facial ectoderm for the patterning of skeletogenic neural crest cells in zebrafish. *Development* 134, 335–345.
- Nichols, J. T., Pan, L., Moens, C. B. and Kimmel, C. B. (2013). barx1 represses joints and promotes cartilage in the craniofacial skeleton. *Development* 140, 2765–2775.
- Panganiban, G. and Rubenstein, J. L. R. (2002). Developmental functions of the Distal-less/Dlx homeobox genes. *Development* 129, 4371–4386.
- Ruest, L.-B., Xiang, X., Lim, K.-C., Levi, G. and Clouthier, D. E. (2004). Endothelin-A receptor-dependent and -independent signaling pathways in establishing mandibular identity. *Development* 131, 4413–4423.
- Sheehan-Rooney, K., Swartz, M. E., Lovely, C. B., Dixon, M. J. and Eberhart, J. K. (2013). Bmp and Shh Signaling Mediate the Expression of satb2 in the Pharyngeal Arches. *PLOS ONE* 8, e59533.
- Tavares, A. L. P., Garcia, E. L., Kuhn, K., Woods, C. M., Williams, T. and Clouthier, D. E. (2012). Ectodermal-derived Endothelin1 is required for patterning the distal and intermediate domains of the mouse mandibular arch. *Dev. Biol.* 371, 47–56.
- Tavares, A. L. P., Cox, T. C., Maxson, R. M., Ford, H. L. and Clouthier, D. E. (2017). Negative regulation of endothelin signaling by SIX1 is required for proper maxillary development. *Development* 144, 2021–2031.
- Vincentz, J. W., Casasnovas, J. J., Barnes, R. M., Que, J., Clouthier, D. E., Wang, J. and Firulli, A. B. (2016). Exclusion of Dlx5/6 expression from the distal-most mandibular arches enables BMP-mediated specification of the distal cap. *Proc. Natl. Acad. Sci.* 113, 7563–7568.
- Zuniga, E., Stellabotte, F. and Crump, J. G. (2010). Jagged-Notch signaling ensures dorsal skeletal identity in the vertebrate face. *Development* 137, 1843–1852.
- Zuniga, E., Rippen, M., Alexander, C., Schilling, T. F. and Crump, J. G. (2011). Gremlin 2 regulates distinct roles of BMP and Endothelin 1 signaling in dorsoventral patterning of the facial skeleton. *Development* 138, 5147–5156.

| <b>zebrafish_gene</b> | <b>mouse_gene</b> | <b>adjustment (hpf)</b> |
|-----------------------|-------------------|-------------------------|
| <i>dr_axin2</i>       | <i>mm_Axin2</i>   | -10                     |
| <i>dr_dlx4b</i>       | <i>mm_Dlx4</i>    | -6                      |
| <i>dr_ednraa</i>      | <i>mm_Ednra</i>   | -5                      |
| <i>dr_fzd6</i>        | <i>mm_Fzd6</i>    | -4                      |
| <i>dr_hand2</i>       | <i>mm_Hand2</i>   | -5                      |
| <i>dr_hey1</i>        | <i>mm_Hey1</i>    | 10                      |
| <i>dr_jag1b</i>       | <i>mm_Jag1</i>    | 10                      |
| <i>dr_mef2ca</i>      | <i>mm_Mef2</i>    | -7                      |
| <i>dr_prrx1a</i>      | <i>mm_Prrx1</i>   | 1                       |
| <i>dr_satb2</i>       | <i>mm_Satb2</i>   | -7                      |
| <i>dr_tfap2a</i>      | <i>mm_Tfap2a</i>  | -5                      |
|                       | <b>Global</b>     | <b>-2.545454545</b>     |
